# Supplementary material
Source: HighWire-hosted journal article supplement (https://gut.bmj.com/content/72/3/484)
Supplement: inline-supplementary-material-1 [file inline-supplementary-material-1.pdf]

**Online supplemental material 1.** Control group description.

Control group (COVID-19 negative patients) was composed by 296 hospitalized patients prospectively enrolled in Internal Medicine units within participating centers, without other infection, acute admitted and thereafter discharged for the following diseases/disorders other than trauma and surgery, by specialty pertinence: neurological (n. 20), cardiovascular (n. 63), respiratory (n. 36), liver (n. 13), kidney (n. 14), diabetes (n. 14), metabolic (n. 3), psychiatric and psychological (n. 3), gynaecological (n. 9), urological (n. 12), rheumatological (n. 6), autoimmune (n. 5), haematological (n. 4), other (n. 58).

**Online supplemental Table 1.** Presence of gastrointestinal symptoms according to GSRS at enrolment in the population included in primary aim analysis.

|                                 | No         | Very Mild | Mild      | Moderate  | Moderate Severe | Severe   | Very Severe | p      |
|---------------------------------|------------|-----------|-----------|-----------|-----------------|----------|-------------|--------|
| <b>Upper digestive symptoms</b> |            |           |           |           |                 |          |             |        |
| Acid regurgitation              |            |           |           |           |                 |          |             | 0.086  |
| Controls                        | 257 (96.3) | 5 (1.9)   | 1 (0.4)   | 4 (1.5)   | 0               | 0        | 0           |        |
| COVID-19 positive               | 562 (92.1) | 7 (1.2)   | 16 (2.6)  | 15 (2.5)  | 4 (0.7)         | 4 (0.7)  | 2 (0.3)     |        |
| Eructation                      |            |           |           |           |                 |          |             | 0.843  |
| COVID-19 negative               | 246 (92.5) | 7 (2.6)   | 5 (1.9)   | 4 (1.5)   | 1 (0.4)         | 3 (1.1)  | 0           |        |
| COVID-19 positive               | 555 (90.7) | 19 (3.1)  | 15 (2.5)  | 8 (1.3)   | 6 (1)           | 6 (1)    | 3 (0.5)     |        |
| Heartburn                       |            |           |           |           |                 |          |             | 0.201  |
| COVID-19 negative               | 251 (94)   | 4 (1.5)   | 5 (1.9)   | 5 (1.9)   | 0               | 2 (0.8)  | 0           |        |
| COVID-19 positive               | 544 (88.7) | 13 (2.1)  | 28 (4.6)  | 12 (2)    | 6 (1)           | 8 (1.3)  | 2 (0.3)     |        |
| Hunger pain                     |            |           |           |           |                 |          |             | 0.102  |
| COVID-19 negative               | 253 (95.1) | 6 (2.3)   | 5 (1.9)   | 1 (0.4)   | 1 (0.4)         | 0        | 0           |        |
| COVID-19 positive               | 560 (91.5) | 9 (1.5)   | 13 (2.1)  | 17 (2.8)  | 3 (0.5)         | 6 (1)    | 4 (0.7)     |        |
| Nausea                          |            |           |           |           |                 |          |             | <0.001 |
| COVID-19 negative               | 233 (87.3) | 10 (3.8)  | 8 (3)     | 6 (2.3)   | 5 (1.9)         | 4 (1.5)  | 1 (0.4)     |        |
| COVID-19 positive               | 433 (71.2) | 33 (5.4)  | 55 (9.1)  | 49 (8.1)  | 19 (3.1)        | 13 (2.1) | 6 (1)       |        |
| <b>Lower digestive symptoms</b> |            |           |           |           |                 |          |             |        |
| Diarrhea                        |            |           |           |           |                 |          |             | <0.001 |
| COVID-19 negative               | 242 (90.6) | 10 (3.8)  | 9 (3.4)   | 4 (1.5)   | 0               | 2 (0.8)  | 0           |        |
| COVID-19 positive               | 383 (62.7) | 15 (2.5)  | 70 (11.5) | 74 (12.1) | 35 (5.7)        | 16 (2.6) | 18 (3)      |        |
| Loose stool                     |            |           |           |           |                 |          |             | <0.001 |
| COVID-19 negative               | 246 (92.1) | 4 (1.5)   | 9 (3.4)   | 5 (1.9)   | 1 (0.4)         | 2 (0.8)  | 0           |        |
| COVID-19 positive               | 445 (72.8) | 23 (3.8)  | 49 (8)    | 49 (8)    | 19 (3.1)        | 14 (2.3) | 12 (2)      |        |
| Urgency                         |            |           |           |           |                 |          |             | 0.001  |
| COVID-19 negative               | 254 (95.1) | 2 (0.8)   | 4 (1.5)   | 6 (2.3)   | 1 (0.4)         | 0        | 0           |        |
| COVID-19 positive               | 513 (84.1) | 18 (3)    | 23 (3.8)  | 32 (5.3)  | 5 (0.8)         | 11 (1.8) | 8 (1.3)     |        |
| Constipation                    |            |           |           |           |                 |          |             | 0.089  |
| COVID-19 negative               | 231 (86.5) | 5 (1.9)   | 10 (3.8)  | 10 (3.8)  | 6 (2.3)         | 3 (1.1)  | 2 (0.8)     |        |
| COVID-19 positive               | 558 (91.2) | 14 (2.3)  | 17 (2.8)  | 15 (2.5)  | 5 (0.8)         | 3 (0.5)  | 0           |        |
| Hard stools                     |            |           |           |           |                 |          |             | 0.038  |
| COVID-19 negative               | 233 (87.3) | 5 (1.9)   | 10 (3.8)  | 9 (3.4)   | 7 (2.6)         | 2 (0.8)  | 1 (0.4)     |        |
| COVID-19 positive               | 562 (92.3) | 13 (2.1)  | 17 (2.8)  | 10 (1.6)  | 3 (0.5)         | 4 (0.7)  | 0           |        |
| Incomplete evacuation           |            |           |           |           |                 |          |             | 0.794  |
| COVID-19 negative               | 244 (91.7) | 6 (2.3)   | 5 (1.9)   | 6 (2.3)   | 4 (1.5)         | 0        | 1 (0.4)     |        |
| COVID-19 positive               | 552 (90.6) | 11 (1.8)  | 19 (3.1)  | 16 (2.6)  | 6 (1)           | 3 (0.5)  | 2 (0.3)     |        |

|                           |            |          |          |          |          |          |         |       |
|---------------------------|------------|----------|----------|----------|----------|----------|---------|-------|
| <b>Abdominal symptoms</b> |            |          |          |          |          |          |         |       |
| Abdominal distension      |            |          |          |          |          |          |         | 0.290 |
| COVID-19 negative         | 237 (88.8) | 4 (1.5)  | 12 (4.5) | 8 (3)    | 5 (1.9)  | 0        | 0       |       |
| COVID-19 positive         | 529 (86.6) | 19 (3.1) | 22 (3.6) | 21 (3.4) | 7 (1.2)  | 9 (1.5)  | 4 (0.7) |       |
| Abdominal pain            |            |          |          |          |          |          |         | 0.088 |
| COVID-19 negative         | 231 (86.5) | 6 (2.3)  | 14 (5.2) | 9 (3.4)  | 2 (0.8)  | 4 (1.5)  | 1 (0.4) |       |
| COVID-19 positive         | 473 (77.8) | 25 (4.1) | 39 (6.4) | 35 (5.8) | 18 (3)   | 13 (2.1) | 5 (0.8) |       |
| Borborygmi                |            |          |          |          |          |          |         | 0.072 |
| COVID-19 negative         | 236 (88.4) | 13 (4.9) | 10 (3.8) | 5 (1.9)  | 3 (1.1)  | 0        | 0       |       |
| COVID-19 positive         | 519 (84.9) | 18 (3)   | 26 (4.3) | 23 (3.8) | 9 (1.5)  | 8 (1.3)  | 8 (1.3) |       |
| Increased flatus          |            |          |          |          |          |          |         | 0.063 |
| COVID-19 negative         | 236 (88.4) | 11 (4.1) | 11 (4.1) | 6 (2.3)  | 3 (1.1)  | 0        | 0       |       |
| COVID-19 positive         | 542 (88.4) | 16 (2.6) | 11 (1.8) | 19 (3.1) | 14 (2.3) | 9 (1.5)  | 2 (0.3) |       |

**Online supplemental Table 2.** Presence of gastrointestinal symptoms according to GSRS at 1 month follow-up in the population included in primary aim analysis.

|                                 | No         | Very Mild | Mild     | Moderate | Moderate Severe | Severe  | Very Severe | p     |
|---------------------------------|------------|-----------|----------|----------|-----------------|---------|-------------|-------|
| <b>Upper digestive symptoms</b> |            |           |          |          |                 |         |             |       |
| Acid regurgitation              |            |           |          |          |                 |         |             | 0.006 |
| COVID-19 negative               | 234 (97.9) | 1 (0.4)   | 3 (1.3)  | 0        | 1 (0.4)         | 0       | 0           |       |
| COVID-19 positive               | 504 (91.6) | 19 (3.5)  | 13 (2.4) | 9 (1.6)  | 0               | 5 (0.9) | 0           |       |
| Eructation                      |            |           |          |          |                 |         |             | 0.819 |
| COVID-19 negative               | 221 (92.5) | 12 (5)    | 2 (0.8)  | 3 (1.3)  | 1 (0.4)         | 0       | 0           |       |
| COVID-19 positive               | 513 (92.9) | 23 (4.2)  | 8 (1.5)  | 5 (0.9)  | 1 (0.2)         | 2 (0.4) | 0           |       |
| Heartburn                       |            |           |          |          |                 |         |             | 0.166 |
| COVID-19 negative               | 230 (96.6) | 4 (1.7)   | 3 (1.3)  | 1 (0.4)  | 0               | 0       | 0           |       |
| COVID-19 positive               | 509 (91.9) | 17 (3.1)  | 9 (1.6)  | 13 (2.4) | 2 (0.4)         | 4 (0.7) | 0           |       |
| Hunger pain                     |            |           |          |          |                 |         |             | 0.085 |
| COVID-19 negative               | 238 (99.6) | 2 (0.4)   | 0        | 0        | 0               | 0       | 0           |       |
| COVID-19 positive               | 526 (95.3) | 8 (1.5)   | 9 (1.6)  | 6 (1.1)  | 1 (0.2)         | 2 (0.4) | 0           |       |
| Nausea                          |            |           |          |          |                 |         |             | 0.015 |
| COVID-19 negative               | 235 (98.3) | 2 (0.8)   | 2 (0.8)  | 0        | 0               | 0       | 0           |       |
| COVID-19 positive               | 504 (91.3) | 29 (5.3)  | 10 (1.8) | 5 (0.9)  | 2 (0.4)         | 2 (0.4) | 0           |       |
| <b>Lower digestive symptoms</b> |            |           |          |          |                 |         |             |       |
| Diarrhea                        |            |           |          |          |                 |         |             | 0.893 |
| COVID-19 negative               | 224 (93.7) | 5 (2.1)   | 7 (2.9)  | 2 (0.8)  | 0               | 1 (0.4) | 0           |       |
| COVID-19 positive               | 510 (92.2) | 16 (2.9)  | 15 (2.7) | 9 (1.6)  | 1 (0.2)         | 2 (0.4) | 0           |       |
| Loose stool                     |            |           |          |          |                 |         |             | 0.723 |
| COVID-19 negative               | 223 (93.7) | 3 (1.3)   | 8 (1.3)  | 3 (1.3)  | 1 (0.4)         | 0       | 0           |       |
| COVID-19 positive               | 503 (91.3) | 16 (2.9)  | 22 (4)   | 5 (0.9)  | 2 (0.4)         | 2 (0.4) | 1 (0.2)     |       |
| Urgency                         |            |           |          |          |                 |         |             | 0.756 |
| COVID-19 negative               | 229 (95.8) | 6 (2.5)   | 2 (0.8)  | 0        | 1 (0.4)         | 1 (0.4) | 0           |       |
| COVID-19 positive               | 523 (94.8) | 12 (2.2)  | 9 (1.6)  | 4 (0.7)  | 1 (0.2)         | 2 (0.4) | 1 (0.2)     |       |
| Constipation                    |            |           |          |          |                 |         |             | 0.074 |
| COVID-19 negative               | 211 (88.3) | 14 (5.9)  | 5 (2.1)  | 4 (1.7)  | 3 (1.3)         | 2 (0.8) | 0           |       |
| COVID-19 positive               | 488 (88.4) | 17 (3.1)  | 31 (5.6) | 8 (1.5)  | 2 (0.4)         | 3 (0.5) | 3 (0.5)     |       |
| Hard stools                     |            |           |          |          |                 |         |             | 0.178 |
| COVID-19 negative               | 215 (90.3) | 9 (3.8)   | 6 (2.5)  | 3 (1.3)  | 2 (0.8)         | 3 (1.3) | 0           |       |
| COVID-19 positive               | 492 (89.1) | 15 (2.7)  | 26 (4.7) | 13 (2.4) | 1 (0.2)         | 2 (0.4) | 3 (0.5)     |       |
| Incomplete evacuation           |            |           |          |          |                 |         |             | 0.098 |
| COVID-19 negative               | 227 (95)   | 8 (3.4)   | 2 (0.8)  | 1 (0.4)  | 1 (0.4)         | 0       | 0           |       |
| COVID-19 positive               | 506 (92)   | 10 (1.8)  | 18 (3.3) | 9 (1.6)  | 1 (0.2)         | 5 (0.9) | 1 (0.2)     |       |

|                           |            |          |          |          |         |         |         |       |
|---------------------------|------------|----------|----------|----------|---------|---------|---------|-------|
| <b>Abdominal symptoms</b> |            |          |          |          |         |         |         |       |
| Abdominal distension      |            |          |          |          |         |         |         | 0.210 |
| COVID-19 negative         | 221 (92.5) | 6 (2.5)  | 5 (2.1)  | 4 (1.7)  | 2 (0.8) | 0       | 1 (0.4) |       |
| COVID-19 positive         | 483 (87.3) | 23 (4.2) | 25 (4.5) | 13 (2.4) | 6 (1.1) | 3 (0.5) | 0       |       |
| Abdominal pain            |            |          |          |          |         |         |         | 0.065 |
| COVID-19 negative         | 227 (95)   | 9 (3.8)  | 3 (1.3)  | 0        | 0       | 0       | 0       |       |
| COVID-19 positive         | 498 (90.1) | 17 (3.1) | 18 (3.3) | 10 (1.8) | 2 (0.4) | 7 (1.3) | 1 (0.2) |       |
| Borborygmi                |            |          |          |          |         |         |         | 0.774 |
| COVID-19 negative         | 221 (92.5) | 8 (3.4)  | 5 (2.1)  | 4 (1.7)  | 1 (0.4) | 0       | 0       |       |
| COVID-19 positive         | 502 (90.9) | 18 (3.3) | 18 (3.3) | 10 (1.8) | 1 (0.2) | 3 (0.5) | 0       |       |
| Increased flatus          |            |          |          |          |         |         |         | 0.326 |
| COVID-19 negative         | 225 (94.1) | 6 (2.5)  | 3 (1.3)  | 4 (1.7)  | 1 (0.4) | 0       | 0       |       |
| COVID-19 positive         | 490 (88.9) | 17 (3.1) | 20 (3.6) | 15 (2.7) | 5 (0.9) | 3 (0.5) | 1 (0.2) |       |

**Online supplemental Table 3.** Presence of gastrointestinal symptoms according to GSRS at 6 months follow-up in the population included in primary aim analysis.

|                                 | No         | Very Mild | Mild     | Moderate | Moderate Severe | Severe  | Very Severe | p      |
|---------------------------------|------------|-----------|----------|----------|-----------------|---------|-------------|--------|
| <b>Upper digestive symptoms</b> |            |           |          |          |                 |         |             |        |
| Acid regurgitation              |            |           |          |          |                 |         |             |        |
| COVID-19 negative               | 189 (90)   | 7 (3.3)   | 7 (3.3)  | 3 (1.4)  | 4 (1.9)         | 0       | 0           |        |
| COVID-19 positive               | 454 (87.6) | 26 (5)    | 20 (3.9) | 11 (2.1) | 6 (1.2)         | 1 (0.2) | 9           |        |
| Eructation                      |            |           |          |          |                 |         |             | 0.605  |
| COVID-19 negative               | 178 (84.8) | 16 (7.6)  | 7 (3.3)  | 7 (3.3)  | 0               | 2 (1)   | 0           |        |
| COVID-19 positive               | 458 (88.3) | 24 (4.6)  | 18 (3.5) | 12 (2.3) | 2 (0.4)         | 4 (0.8) | 1 (0.2)     |        |
| Heartburn                       |            |           |          |          |                 |         |             | 0.363  |
| COVID-19 negative               | 187 (89.5) | 8 (3.8)   | 7 (3.4)  | 2 (1)    | 4 (1.9)         | 1 (0.5) | 0           |        |
| COVID-19 positive               | 456 (88)   | 23 (4.4)  | 22 (4.3) | 12 (2.3) | 5 (1)           | 0       | 0           |        |
| Hunger pain                     |            |           |          |          |                 |         |             | 0.463  |
| COVID-19 negative               | 201 (96.2) | 4 (1.9)   | 1 (0.5)  | 3 (1.4)  | 0               | 0       | 0           |        |
| COVID-19 positive               | 484 (93.4) | 12 (2.3)  | 10 (1.9) | 9 (1.7)  | 0               | 3 (0.6) | 0           |        |
| Nausea                          |            |           |          |          |                 |         |             | 0.727  |
| COVID-19 negative               | 191 (91.4) | 7 (3.4)   | 4 (1.9)  | 4 (1.9)  | 1 (0.5)         | 2 (1)   | 0           |        |
| COVID-19 positive               | 476 (91.9) | 17 (3.3)  | 14 (2.7) | 7 (1.4)  | 3 (0.6)         | 1 (0.2) | 0           |        |
| <b>Lower digestive symptoms</b> |            |           |          |          |                 |         |             |        |
| Diarrhea                        |            |           |          |          |                 |         |             | 0.775  |
| COVID-19 negative               | 188 (89.5) | 10 (4.8)  | 4 (1.9)  | 7 (3.3)  | 1 (0.5)         | 0       | 0           |        |
| COVID-19 positive               | 461 (88.8) | 26 (5)    | 16 (3.1) | 11 (2.1) | 3 (0.6)         | 2 (0.4) | 0           |        |
| Loose stool                     |            |           |          |          |                 |         |             | 0.882  |
| COVID-19 negative               | 188 (89.5) | 8 (3.8)   | 7 (3.3)  | 6 (2.9)  | 1 (0.5)         | 0       | 0           |        |
| COVID-19 positive               | 467 (90)   | 17 (3.3)  | 14 (2.7) | 14 (2.7) | 4 (0.8)         | 3 (0.6) | 0           |        |
| Urgency                         |            |           |          |          |                 |         |             | 0.731  |
| COVID-19 negative               | 201 (96.2) | 3 (1.4)   | 3 (1.4)  | 2 (1)    | 0               | 0       | 0           |        |
| COVID-19 positive               | 492 (94.8) | 9 (1.7)   | 5 (1)    | 8 (1.5)  | 4 (0.8)         | 0       | 1 (0.2)     |        |
| Constipation                    |            |           |          |          |                 |         |             | <0.001 |
| COVID-19 negative               | 174 (82.9) | 17 (8.1)  | 5 (2.4)  | 9 (4.3)  | 0               | 2 (1)   | 3 (1.4)     |        |
| COVID-19 positive               | 471 (91.1) | 12 (2.3)  | 19 (3.7) | 13 (2.5) | 1 (0.2)         | 1 (0.2) | 0           |        |
| Hard stools                     |            |           |          |          |                 |         |             | 0.030  |
| COVID-19 negative               | 173 (82.8) | 12 (5.7)  | 8 (3.8)  | 10 (4.8) | 1 (0.5)         | 2 (1)   | 3 (1.4)     |        |
| COVID-19 positive               | 467 (90.5) | 19 (3.7)  | 11 (2.1) | 15 (2.9) | 2 (0.4)         | 2 (0.4) | 0           |        |
| Incomplete evacuation           |            |           |          |          |                 |         |             | 0.495  |
| COVID-19 negative               | 187 (90.3) | 6 (2.9)   | 6 (2.9)  | 3 (1.5)  | 2 (1)           | 1 (0.5) | 2 (1)       |        |
| COVID-19 positive               | 472 (91.8) | 17 (3.3)  | 10 (2)   | 9 (1.8)  | 5 (1)           | 0       | 1 (0.2)     |        |

|                           |            |          |          |          |          |         |         |       |
|---------------------------|------------|----------|----------|----------|----------|---------|---------|-------|
| <b>Abdominal symptoms</b> |            |          |          |          |          |         |         |       |
| Abdominal distension      |            |          |          |          |          |         |         | 0.967 |
| COVID-19 negative         | 176 (83.8) | 16 (7.6) | 7 (3.3)  | 7 (3.3)  | 2 (1)    | 2 (1)   | 0       |       |
| COVID-19 positive         | 424 (81.9) | 37 (7.1) | 22 (4.3) | 20 (3.9) | 8 (1.5)  | 6 (1.2) | 1 (0.2) |       |
| Abdominal pain            |            |          |          |          |          |         |         | 0.857 |
| COVID-19 negative         | 188 (89.5) | 8 (3.8)  | 8 (3.8)  | 5 (2.4)  | 1 (0.5)  | 0       | 0       |       |
| COVID-19 positive         | 451 (86.9) | 23 (4.4) | 24 (4.6) | 14 (2.7) | 14 (2.7) | 4 (0.8) | 3 (0.6) |       |
| Borborygmi                |            |          |          |          |          |         |         | 0.428 |
| COVID-19 negative         | 170 (81.3) | 20 (9.6) | 9 (4.3)  | 7 (3.4)  | 1 (0.5)  | 1 (0.5) | 1 (0.5) |       |
| COVID-19 positive         | 431 (83)   | 34 (6.6) | 23 (4.4) | 19 (3.7) | 8 (1.5)  | 4 (0.8) | 0       |       |
| Increased flatus          |            |          |          |          |          |         |         | 0.024 |
| COVID-19 negative         | 169 (80.9) | 13 (6.2) | 16 (7.7) | 6 (2.9)  | 1 (0.5)  | 4 (1.9) | 0       |       |
| COVID-19 positive         | 427 (82.4) | 34 (6.6) | 14 (2.7) | 25 (4.8) | 11 (2.1) | 5(1)    | 2 (0.4) |       |

**Online supplemental Table 4.** Presence of gastrointestinal symptoms according to GSRS at 12 months follow-up in the population included in primary aim analysis.

|                                 | No         | Very Mild | Mild     | Moderate | Moderate Severe | Severe  | Very Severe | p     |
|---------------------------------|------------|-----------|----------|----------|-----------------|---------|-------------|-------|
| <b>Upper digestive symptoms</b> |            |           |          |          |                 |         |             |       |
| Acid regurgitation              |            |           |          |          |                 |         |             | 0.627 |
| COVID-19 negative               | 152 (89.9) | 7 (4.1)   | 4 (2.4)  | 3 (1.8)  | 3 (1.8)         | 0       | 0           |       |
| COVID-19 positive               | 344 (87.1) | 19 (4.8)  | 15 (3.8) | 13 (3.3) | 3 (0.7)         | 1 (0.3) | 0           |       |
| Eructation                      |            |           |          |          |                 |         |             | 0.764 |
| COVID-19 negative               | 150 (88.8) | 12 (7.1)  | 4 (2.4)  | 1 (0.6)  | 2 (1.2)         | 0       | 0           |       |
| COVID-19 positive               | 353 (89.4) | 19 (4.8)  | 12 (3)   | 5 (1.3)  | 3 (0.8)         | 1 (0.3) | 2 (0.5)     |       |
| Heartburn                       |            |           |          |          |                 |         |             | 0.591 |
| COVID-19 negative               | 151 (89.9) | 6 (3.6)   | 8 (4.8)  | 1 (0.6)  | 1 (0.6)         | 1 (0.6) | 0           |       |
| COVID-19 positive               | 342 (87)   | 21 (5.3)  | 16 (4.1) | 10 (2.5) | 3 (0.8)         | 1 (0.3) | 0           |       |
| Hunger pain                     |            |           |          |          |                 |         |             | 0.622 |
| COVID-19 negative               | 160 (95.2) | 1 (0.6)   | 4 (2.4)  | 2 (1.2)  | 0               | 1 (0.6) | 0           |       |
| COVID-19 positive               | 361 (92.1) | 9 (2.3)   | 12 (3.1) | 8 (2)    | 1 (0.3)         | 1 (0.3) | 0           |       |
| Nausea                          |            |           |          |          |                 |         |             | 0.490 |
| COVID-19 negative               | 154 (91.7) | 7 (4.2)   | 3 (1.8)  | 4 (2.4)  | 0               | 0       | 0           |       |
| COVID-19 positive               | 366 (92.9) | 11 (2.8)  | 8 (2)    | 4 (1)    | 2 (0.5)         | 3 (0.8) | 0           |       |
| <b>Lower digestive symptoms</b> |            |           |          |          |                 |         |             |       |
| Diarrhea                        |            |           |          |          |                 |         |             | 0.411 |
| COVID-19 negative               | 153 (90.5) | 4 (2.4)   | 6 (3.6)  | 5 (3)    | 0               | 1 (0.6) | 0           |       |
| COVID-19 positive               | 354 (89.9) | 18 (4.6)  | 11 (2.8) | 6 (1.5)  | 4 (1)           | 1 (0.3) | 0           |       |
| Loose stool                     |            |           |          |          |                 |         |             | 0.510 |
| COVID-19 negative               | 151 (89.4) | 7 (4.1)   | 8 (4.7)  | 3 (1.8)  | 0               | 0       | 0           |       |
| COVID-19 positive               | 361 (91.4) | 13 (3.3)  | 10 (2.5) | 6 (1.5)  | 2 (0.5)         | 3 (0.8) | 0           |       |
| Urgency                         |            |           |          |          |                 |         |             | 0.577 |
| COVID-19 negative               | 158 (93.5) | 5 (3)     | 3 (1.8)  | 3 (1.8)  | 0               | 0       | 0           |       |
| COVID-19 positive               | 370 (93.7) | 10 (2.5)  | 2 (0.5)  | 10 (2.5) | 2 (0.5)         | 1 (0.3) | 0           |       |
| Constipation                    |            |           |          |          |                 |         |             | 0.019 |
| COVID-19 negative               | 142 (84)   | 4 (2.4)   | 15 (8.9) | 5 (3)    | 1 (0.6)         | 1 (0.6) | 1 (0.6)     |       |
| COVID-19 positive               | 357 (90.4) | 16 (4.1)  | 11 (2.8) | 6 (1.5)  | 4 (1)           | 1 (0.3) | 0           |       |
| Hard stools                     |            |           |          |          |                 |         |             | 0.011 |
| COVID-19 negative               | 139 (82.3) | 7 (4.1)   | 14 (8.3) | 4 (2.4)  | 1 (0.6)         | 2 (1.2) | 2 (1.2)     |       |
| COVID-19 positive               | 350 (89.1) | 19 (4.8)  | 9 (2.3)  | 10 (2.5) | 3 (0.8)         | 2 (0.5) | 0           |       |
| Incomplete evacuation           |            |           |          |          |                 |         |             | 0.769 |
| COVID-19 negative               | 151 (90.4) | 8 (4.8)   | 3 (1.8)  | 3 (1.8)  | 1 (0.6)         | 0       | 1 (0.6)     |       |
| COVID-19 positive               | 359 (91.8) | 16 (4.1)  | 7 (1.8)  | 7 (1.8)  | 1 (0.3)         | 1 (0.3) | 0           |       |

|                           |            |           |          |          |         |         |         |       |
|---------------------------|------------|-----------|----------|----------|---------|---------|---------|-------|
| <b>Abdominal symptoms</b> |            |           |          |          |         |         |         |       |
| Abdominal distension      |            |           |          |          |         |         |         | 0.302 |
| COVID-19 negative         | 145 (85.8) | 11 (6.5)  | 8 (4.7)  | 4 (2.4)  | 1 (0.6) | 0       | 0       |       |
| COVID-19 positive         | 316 (80)   | 26 (6.6)  | 17 (4.3) | 24 (6.1) | 6 (1.5) | 4 (1)   | 2 (0.5) |       |
| Abdominal pain            |            |           |          |          |         |         |         | 0.945 |
| COVID-19 negative         | 150 (89.3) | 6 (3.6)   | 5 (3)    | 6 (3.6)  | 0       | 1 (0.6) | 0       |       |
| COVID-19 positive         | 341 (86.8) | 15 (3.8)  | 17 (4.3) | 16 (4.1) | 1 (0.3) | 3 (0.8) | 0       |       |
| Borborygmi                |            |           |          |          |         |         |         | 0.101 |
| COVID-19 negative         | 140 (83.3) | 19 (11.3) | 6 (3.6)  | 2 (1.2)  | 1 (0.6) | 0       | 0       |       |
| COVID-19 positive         | 329 (83.3) | 24 (6.1)  | 14 (3.5) | 16 (4.1) | 6 (1.5) | 4 (1)   | 2 (0.5) |       |
| Increased flatus          |            |           |          |          |         |         |         | 0.388 |
| COVID-19 negative         | 137 (81.1) | 15 (8.9)  | 11 (6.5) | 5 (3)    | 1 (0.6) | 0       | 0       |       |
| COVID-19 positive         | 317 (80.5) | 27 (6.9)  | 18 (4.6) | 18 (4.6) | 9 (2.3) | 4 (1)   | 1 (0.3) |       |

**Online supplemental Table 5.** Presence of gastrointestinal symptoms according to GSRS at 12 months follow-up in the population included in the entire study cohort for exploratory endpoints.

|                                 | No         | Very Mild | Mild      | Moderate | Moderate Severe | Severe   | Very Severe | p     |
|---------------------------------|------------|-----------|-----------|----------|-----------------|----------|-------------|-------|
| <b>Upper digestive symptoms</b> |            |           |           |          |                 |          |             |       |
| Acid regurgitation              |            |           |           |          |                 |          |             | 0.204 |
| COVID-19 negative               | 377 (84.2) | 23 (5.1)  | 19 (4.2)  | 14 (3.1) | 9 (2)           | 4 (0.9)  | 2 (0.5)     |       |
| COVID-19 positive               | 646 (78.9) | 60 (7.3)  | 52 (6.4)  | 38 (4.6) | 14 (1.7)        | 8 (1)    | 1 (0.1)     |       |
| Eructation                      |            |           |           |          |                 |          |             | 0.330 |
| COVID-19 negative               | 376 (83.7) | 27 (6)    | 17 (3.8)  | 13 (2.9) | 10 (2.2)        | 5 (1.1)  | 1 (0.2)     |       |
| COVID-19 positive               | 675 (82.5) | 54 (6.6)  | 46 (5.6)  | 19 (2.3) | 9 (1.1)         | 8 (1)    | 7 (0.9)     |       |
| Heartburn                       |            |           |           |          |                 |          |             | 0.883 |
| COVID-19 negative               | 371 (82.8) | 26 (5.8)  | 27 (6)    | 12 (2.7) | 8 (1.8)         | 3 (0.7)  | 1 (0.2)     |       |
| COVID-19 positive               | 654 (80.3) | 56 (6.9)  | 51 (6.3)  | 29 (3.6) | 13 (1.6)        | 8 (1)    | 4 (0.5)     |       |
| Hunger pain                     |            |           |           |          |                 |          |             | 0.041 |
| COVID-19 negative               | 397 (88.6) | 9 (2)     | 21 (4.7)  | 15 (3.4) | 3 (0.7)         | 3 (0.7)  | 0           |       |
| COVID-19 positive               | 699 (85.8) | 48 (5.9)  | 36 (4.4)  | 21 (2.6) | 7 (0.9)         | 2 (0.3)  | 2 (0.3)     |       |
| Nausea                          |            |           |           |          |                 |          |             | 0.130 |
| COVID-19 negative               | 384 (85.7) | 20 (4.5)  | 24 (5.4)  | 13 (2.9) | 2 (0.5)         | 3 (0.7)  | 2 (0.5)     |       |
| COVID-19 positive               | 716 (87.6) | 48 (5.9)  | 21 (2.6)  | 19 (2.3) | 7 (0.9)         | 5 (0.6)  | 1 (0.1)     |       |
| <b>Lower digestive symptoms</b> |            |           |           |          |                 |          |             |       |
| Diarrhea                        |            |           |           |          |                 |          |             | 0.073 |
| COVID-19 negative               | 382 (85.1) | 19 (4.2)  | 25 (5.6)  | 20 (4.5) | 1 (0.2)         | 1 (0.2)  | 1 (0.2)     |       |
| COVID-19 positive               | 688 (84.2) | 58 (7.1)  | 35 (4.3)  | 24 (2.9) | 8 (1)           | 4 (0.5)  | 0           |       |
| Loose stool                     |            |           |           |          |                 |          |             | 0.012 |
| COVID-19 negative               | 383 (85.5) | 21 (4.7)  | 26 (5.8)  | 17 (3.8) | 0               | 0        | 1 (0.2)     |       |
| COVID-19 positive               | 700 (85.5) | 55 (6.7)  | 26 (3.2)  | 25 (3.1) | 8 (1)           | 5 (0.6)  | 0           |       |
| Urgency                         |            |           |           |          |                 |          |             | 0.059 |
| COVID-19 negative               | 412 (91.8) | 10 (2.2)  | 11 (2.5)  | 15 (3.3) | 0               | 1 (0.2)  | 0           |       |
| COVID-19 positive               | 743 (90.8) | 26 (3.2)  | 10 (1.2)  | 21 (2.6) | 7 (0.9)         | 6 (0.7)  | 5 (0.6)     |       |
| Constipation                    |            |           |           |          |                 |          |             | 0.013 |
| COVID-19 negative               | 318 (70.8) | 20 (4.5)  | 59 (13.1) | 28 (6.2) | 11 (2.5)        | 8 (1.8)  | 5 (1.1)     |       |
| COVID-19 positive               | 626 (76.7) | 54 (6.6)  | 60 (7.4)  | 36 (4.4) | 19 (2.3)        | 14 (1.7) | 7 (0.9)     |       |
| Hard stools                     |            |           |           |          |                 |          |             | 0.196 |
| COVID-19 negative               | 324 (72.2) | 29 (6.5)  | 43 (9.6)  | 26 (5.8) | 12 (2.7)        | 11 (2.5) | 4 (0.9)     |       |
| COVID-19 positive               | 625 (76.5) | 62 (7.6)  | 48 (5.9)  | 41 (5)   | 17 (2.1)        | 14 (1.7) | 10 (1.2)    |       |
| Incomplete evacuation           |            |           |           |          |                 |          |             | 0.886 |
| COVID-19 negative               | 374 (83.9) | 20 (4.5)  | 18 (4)    | 17 (3.8) | 9 (2)           | 5 (1.1)  | 3 (0.7)     |       |
| COVID-19 positive               | 701 (86)   | 32 (3.9)  | 26 (3.2)  | 31 (3.8) | 10 (1.2)        | 8 (1)    | 7 (0.9)     |       |

|                           |            |          |          |          |          |          |         |       |
|---------------------------|------------|----------|----------|----------|----------|----------|---------|-------|
| <b>Abdominal symptoms</b> |            |          |          |          |          |          |         |       |
| Abdominal distension      |            |          |          |          |          |          |         | 0.413 |
| COVID-19 negative         | 314 (70.1) | 38 (8.5) | 32 (7.1) | 31 (6.9) | 19 (4.2) | 7 (1.6)  | 7 (1.6) |       |
| COVID-19 positive         | 581 (71.1) | 71 (8.7) | 65 (8)   | 52 (6.4) | 20 (2.5) | 21 (2.6) | 7 (0.9) |       |
| Abdominal pain            |            |          |          |          |          |          |         | 0.213 |
| COVID-19 negative         | 346 (77.4) | 23 (5.2) | 35 (7.8) | 29 (6.5) | 5 (1.1)  | 6 (1.3)  | 3 (0.7) |       |
| COVID-19 positive         | 633 (77.5) | 63 (7.7) | 60 (7.3) | 36 (4.4) | 12 (1.5) | 12 (1.5) | 1 (0.1) |       |
| Borborygmi                |            |          |          |          |          |          |         | 0.048 |
| COVID-19 negative         | 350 (78.1) | 45 (10)  | 25 (5.6) | 18 (4)   | 9 (2)    | 1 (0.2)  | 0       |       |
| COVID-19 positive         | 650 (79.5) | 64 (7.8) | 30 (3.7) | 39 (4.8) | 16 (2)   | 12 (1.5) | 7 (0.9) |       |
| Increased flatus          |            |          |          |          |          |          |         | 0.687 |
| COVID-19 negative         | 328 (73.2) | 33 (7.4) | 32 (7.1) | 25 (5.6) | 19 (4.2) | 6 (1.3)  | 5 (1.1) |       |
| COVID-19 positive         | 621 (76)   | 56 (6.9) | 53 (6.5) | 32 (3.9) | 29 (3.6) | 18 (2.2) | 8 (1)   |       |

**Online supplemental Table 6.** DGBI, anxiety and depression occurrence at 6 and 12 months follow-up in the population included in the entire study cohort for exploratory endpoints.

|                                      | <i>6 Months follow-up</i>                |                                           |          | <i>12 Months follow-up</i>               |                                          |          |
|--------------------------------------|------------------------------------------|-------------------------------------------|----------|------------------------------------------|------------------------------------------|----------|
|                                      | <b>Controls</b><br>n (%)<br><i>n=633</i> | <b>COVID-19</b><br>n (%)<br><i>n=1167</i> | <b>P</b> | <b>Controls</b><br>n (%)<br><i>n=532</i> | <b>COVID-19</b><br>n (%)<br><i>n=918</i> | <b>P</b> |
| <b>DGBI</b>                          |                                          |                                           |          |                                          |                                          |          |
| Epigastric pain syndrome             | 18 (2.8)                                 | 41 (3.5)                                  | 0.446    | 20 (3.8)                                 | 36 (3.9)                                 | 0.872    |
| Post-prandial distress syndrome      | 23 (3.6)                                 | 32 (2.7)                                  | 0.294    | 30 (5.6)                                 | 50 (5.5)                                 | 0.877    |
| Functional dyspepsia                 | 34 (5.4)                                 | 64 (5.5)                                  | 0.920    | 31 (5.9)                                 | 55 (6)                                   | 0.892    |
| Chronic nausea and vomiting syndrome | 12 (1.9)                                 | 15 (1.3)                                  | 0.309    | 11 (2.1)                                 | 15 (1.6)                                 | 0.552    |
| Cyclic vomiting syndrome             | 4 (0.6)                                  | 4 (0.3)                                   | 0.379    | 4 (0.8)                                  | 1 (0.1)                                  | 0.044    |
| Functional diarrhea                  | 2 (0.3)                                  | 4 (0.3)                                   | 0.925    | 0                                        | 5 (0.6)                                  | 0.088    |
| Irritable bowel syndrome             | 30 (4.7)                                 | 43 (3.7)                                  | 0.279    | 28 (5.3)                                 | 48 (5.3)                                 | 0.983    |
| <b>HADS</b>                          |                                          |                                           |          |                                          |                                          |          |
| <b><i>Depression</i></b>             |                                          |                                           | 0.083    |                                          |                                          | 0.111    |
| Normal                               | 555 (87.7)                               | 981 (84.1)                                |          | 467 (88.1)                               | 768 (84.1)                               |          |
| Borderline abnormal                  | 45 (7.1)                                 | 118 (10.1)                                |          | 41 (7.7)                                 | 97 (10.6)                                |          |
| Abnormal                             | 33 (5.2)                                 | 68 (5.8)                                  |          | 22 (4.2)                                 | 48 (5.3)                                 |          |
| <b><i>Anxiety</i></b>                |                                          |                                           | 0.409    |                                          |                                          | 0.091    |
| Normal                               | 531 (87.8)                               | 938 (85.6)                                |          | 465 (87.7)                               | 783 (85.8)                               |          |
| Borderline abnormal                  | 52 (8.5)                                 | 89 (8.1)                                  |          | 45 (8.5)                                 | 71 (7.8)                                 |          |
| Abnormal                             | 29 (4.7)                                 | 69 (6.3)                                  |          | 20 (3.8)                                 | 59 (6.5)                                 |          |

Abbreviations: COVID-19: coronavirus 19 associated disease; n: number; DGBI: Disorders of Gut-Brain Interaction; HADS: Hospital Anxiety and Depression Scale.

**Online supplemental Table 7.** Baseline laboratory and clinical characteristics of hospitalized COVID-19 patients selected for primary aim analysis.

|                                                             | <b>No IBS</b><br>n (%) or Mean $\pm$ SD<br><i>n=421</i> | <b>IBS</b><br>n (%) or Mean $\pm$ SD<br><i>n= 14</i> | <b>p</b> |
|-------------------------------------------------------------|---------------------------------------------------------|------------------------------------------------------|----------|
| <b>Demographics and anamnestics</b>                         |                                                         |                                                      |          |
| Age                                                         | 49.1 $\pm$ 15.4                                         | 53.7 $\pm$ 14.2                                      | 0.322    |
| Sex (male)                                                  | 250 (60.2)                                              | 8 (57.1)                                             | 0.816    |
| BMI                                                         | 28 $\pm$ 5.5                                            | 25.5 $\pm$ 3.6                                       | 0.119    |
| Smoke                                                       |                                                         |                                                      | 0.450    |
| No                                                          | 295 (70.9)                                              | 12 (85.7)                                            |          |
| Current                                                     | 39 (9.4)                                                | 1 (7.1)                                              |          |
| Former                                                      | 82 (19.7)                                               | 1 (7.1)                                              |          |
| <b>Alcohol consumption</b>                                  | 66 (15.9)                                               | 3 (21.4)                                             | 0.580    |
| <b>Physical activity (at least 30 minutes 3 times/week)</b> | 134 (34)                                                | 4 (33.3)                                             | 0.961    |
| <b>Comorbidities</b>                                        |                                                         |                                                      |          |
| Neurological                                                | 13 (3.1)                                                | 0                                                    | 0.505    |
| Cardiovascular                                              | 111 (26.2)                                              | 5 (35.7)                                             | 0.430    |
| Respiratory                                                 | 28 (6.6)                                                | 0                                                    | 0.320    |
| Liver                                                       | 14 (3.3)                                                | 2 (14.3)                                             | 0.031    |
| Kidney                                                      | 16 (3.8)                                                | 1 (7.1)                                              | 0.522    |
| Diabetes                                                    | 62 (14.7)                                               | 4 (28.6)                                             | 0.153    |
| Metabolic other than diabetes                               | 39 (9.2)                                                | 1 (7.1)                                              | 0.791    |
| Musculoskeletal                                             | 8 (1.9)                                                 | 1 (7.1)                                              | 0.173    |
| Psychiatric                                                 | 6 (1.4)                                                 | 0                                                    | 0.654    |
| Gynecological                                               | 1 (0.2)                                                 | 0                                                    | 0.855    |
| Urological                                                  | 13 (3.1)                                                | 1 (7.1)                                              | 0.395    |
| Rheumatological                                             | 8 (1.9)                                                 | 1 (7.1)                                              | 0.173    |
| Allergies                                                   | 11 (2.6)                                                | 2 (14.3)                                             | 0.011    |
| Autoimmune                                                  | 11 (2.6)                                                | 1 (7.1)                                              | 0.306    |
| Neoplastic                                                  | 7 (1.7)                                                 | 0                                                    | 0.628    |
| Psychological                                               | 7 (1.7)                                                 | 0                                                    | 0.628    |
| Hematological                                               | 5 (1.2)                                                 | 1 (7.1)                                              | 0.059    |
| <b>Chronic medication intake with GI effect</b>             |                                                         |                                                      |          |
| Proton pump inhibitors                                      | 51 (12.1)                                               | 5 (35.7)                                             | 0.009    |
| Non-steroidal anti-inflammatory drugs                       | 20 (4.7)                                                | 0                                                    | 0.405    |
| Steroids                                                    | 7 (1.7)                                                 | 0                                                    | 0.628    |
| Metformin                                                   | 23 (5.4)                                                | 0                                                    | 0.370    |
| Serotonin selective re-uptake inhibitors                    | 10 (2.4)                                                | 0                                                    | 0.561    |
| Antipsychotic                                               | 3 (0.7)                                                 | 0                                                    | 0.752    |
| Iron                                                        | 4 (1)                                                   | 0                                                    | 0.715    |
| Fibrates                                                    | 4 (1)                                                   | 0                                                    | 0.715    |
| ACE-I                                                       | 38 (9)                                                  | 1 (7.1)                                              | 0.812    |
| Beta-blockers                                               | 49 (11.6)                                               | 2 (14.3)                                             | 0.757    |
| Angiotensin-2 antagonist                                    | 35 (8.3)                                                | 2 (14.3)                                             | 0.427    |
| Lithium                                                     | -                                                       | -                                                    | -        |
| Carbamazepine                                               | 1 (0.2)                                                 | 0                                                    | 0.855    |

|                                               |            |            |        |
|-----------------------------------------------|------------|------------|--------|
| Furosemide                                    | 6 (1.4)    | 0          | 0.654  |
| 5-ASA                                         | 5 (1.2)    | 0          | 0.682  |
| Rifaximin                                     | -          | -          | -      |
| Opiates                                       | 2 (0.5)    | 0          | 0.797  |
| Anticholinergics                              | -          | -          | -      |
| Verapamil                                     | 2 (0.5)    | 0          | 0.797  |
| Levothyroxine                                 | 13 (3.1)   | 0          | 0.505  |
| Cholestyramine                                | -          | -          | -      |
| Monoclonal antibodies                         | -          | -          | -      |
| Digoxin                                       | 2 (0.5)    | 0          | 0.797  |
| Dopaminergic agents                           | 1 (0.2)    | 0          | 0.855  |
| H2 blockers                                   | 0          | 1 (7.1)    | <0.001 |
| Benzodiazepines                               | 8 (1.9)    | 1 (7.1)    | 0.173  |
| Tricyclic antidepressant                      | 2 (0.5)    | 0          | 0.797  |
| Antibiotics in the last 3 months              | 101 (24.1) | 7 (50)     | 0.027  |
| Probiotics in the last 3 months               | 33 (7.9)   | 4 (28.6)   | 0.006  |
| <b>Blood tests</b>                            |            |            |        |
| WBC (*10 <sup>3</sup> /mm <sup>3</sup> )      | 6.4 ±3     | 5.2 ±2.2   | 0.088  |
| Hb (g/dL)                                     | 13.4 ±1.9  | 13.2 ±2    | 0.709  |
| Platelet (*10 <sup>3</sup> /mm <sup>3</sup> ) | 220 ±89.6  | 204 ±111   | 0.141  |
| INR                                           | 1.1 ±0.3   | 1.1 ±0.1   | 0.469  |
| Creatinine (mg/dL)                            | 1.18 ±0.27 | 0.87 ±0.22 | 0.983  |
| AST (U/L)                                     | 38 ±33     | 30 ±12     | 0.664  |
| ALT (U/L)                                     | 42 ±50     | 36 ±31     | 0.541  |
| Total bilirubin (mg/dL)                       | 0.89 ±1.84 | 0.61 ±0.30 | 0.637  |
| GGT (U/L)                                     | 72 ±153    | 32 ±18     | 0.434  |
| Ferritin (ng/mL)                              | 418 ±520   | 411 ±275   | 0.438  |
| C reactive protein (mg/dL)                    | 12.3 ±25.4 | 12.8 ±35.9 | 0.119  |
| <b>Common symptoms</b>                        |            |            |        |
| Fever                                         | 295 (70.1) | 13 (92.9)  | 0.065  |
| Fatigue                                       | 234 (55.6) | 6 (42.9)   | 0.346  |
| Cough                                         | 231 (54.9) | 12 (85.7)  | 0.022  |
| Myalgia                                       | 151 (35.9) | 4 (28.6)   | 0.575  |
| Dyspnea                                       | 127 (30.2) | 9 (64.3)   | 0.007  |
| Runny nose                                    | 32 (7.6)   | 1 (7.1)    | 0.949  |
| Headache                                      | 129 (30.6) | 1 (7.1)    | 0.059  |
| Anosmia                                       | 112 (26.6) | 4 (28.6)   | 0.870  |
| Dysgeusia                                     | 99 (23.5)  | 3 (21.4)   | 0.856  |
| <b>HRCT</b>                                   |            |            |        |
| HRCT with pattern COVID-19 like               | 195 (83.7) | 11 (100)   | 0.145  |
| <b>In-hospital treatments</b>                 |            |            |        |
| Antibiotics                                   | 254 (60.3) | 12 (85.7)  | 0.055  |
| Antimycotic                                   | 10 (2.4)   | 1 (7.1)    | 0.268  |
| COVID-19 targeted therapies                   | 321 (77)   | 13 (92.9)  | 0.162  |
| <b>Outcomes</b>                               |            |            |        |
| Need for ICU                                  | 42 (10.3)  | 1 (7.1)    | 0.698  |
| Need for mechanical ventilation               | 26 (6.4)   | 0          | 0.328  |

Abbreviations: COVID-19: coronavirus 19 associated disease; n: number; SD: standard deviation; BMI: body mass index; WBC: white blood cells; Hb: hemoglobin; INR: international normalized

*ratio; AST: aspartate amino-transferase; ALT: alanine amino-transferase; GGT: gamma-glutamyl transferase; HRCT: High resolution computed tomography; SARS-CoV-2: severe acute respiratory syndrome coronavirus 2; ICU: intensive care unit.*

**Online supplemental Table 8.** Post-hoc analysis reporting symptoms presence and severity of post-COVID-19 IBS patients according to GSRS.

|                       | No       | Very Mild | Mild     | Moderate | Moderate Severe | Severe   | Very Severe |
|-----------------------|----------|-----------|----------|----------|-----------------|----------|-------------|
| Diarrhea              | 5 (35.7) | 3 (21.4)  | 3 (21.4) | 2 (14.3) | 1 (7.1)         | 0        | 0           |
| Loose stool           | 7 (50)   | 2 (14.3)  | 2 (14.3) | 1 (7.1)  | 0               | 2 (14.3) | 0           |
| Urgency               | 8 (57.1) | 3 (21.4)  | 0        | 2 (14.3) | 1 (7.1)         | 0        | 0           |
| Constipation          | 9 (64.3) | 0         | 2 (18.2) | 1 (7.1)  | 2 (14.3)        | 0        | 0           |
| Hard stools           | 9 (64.3) | 0         | 2 (18.2) | 1 (7.1)  | 2 (14.3)        | 0        | 0           |
| Incomplete evacuation | 9 (64.3) | 2 (14.3)  | 0        | 1 (7.1)  | 1 (7.1)         | 1 (7.1)  | 0           |
| Abdominal pain        | 0        | 2 (14.3)  | 4 (28.6) | 6 (37.5) | 1 (7.1)         | 1 (7.1)  | 0           |

**Online supplemental Table 9.** Post-hoc analysis with Uni- and Multivariate Logistic Regression for Identifying Factors Associated with Irritable Bowel Syndrome Occurrence at 12 Months Follow-up in the study cohort (COVID-19 and controls) Selected for Primary Aim Analysis.

|                                                 | <i>Univariate</i>    |          | <i>Multivariate</i>   |          |
|-------------------------------------------------|----------------------|----------|-----------------------|----------|
|                                                 | <b>OR (95% CI)</b>   | <b>P</b> | <b>OR (95% CI)</b>    | <b>P</b> |
| BMI                                             | 0.907 (0.810-1.016)  | 0.093    |                       |          |
| <b>Comorbidities</b>                            |                      |          |                       |          |
| Allergies                                       | 4.112 (0.874-19.341) | 0.073    | 7.642 (1.476-39.563)  | 0.015    |
| <b>Chronic medication intake</b>                |                      |          |                       |          |
| Proton pump inhibitors                          | 3.483 (1.212-10.007) | 0.020    | 5.439 (1.783-16.591)  | 0.003    |
| <b>Clinical course</b>                          |                      |          |                       |          |
| COVID-19 diagnosis                              | 6.218 (0.812-47.636) | 0.079    | 10.686 (1.291-88.479) | 0.028    |
| Fever                                           | 6.008 (1.344-26.849) | 0.019    |                       |          |
| Cough                                           | 5.879 (1.642-21.047) | 0.006    |                       |          |
| Dyspnea                                         | 4.682 (1.639-13.373) | 0.004    |                       |          |
| Diarrhea (GSRS at enrollment)                   | 1.265 (0.985-1.626)  | 0.066    |                       |          |
| Abdominal distension (GSRS at enrollment)       | 1.318 (0.971-1.789)  | 0.077    |                       |          |
| Incomplete evacuation (GSRS at enrollment)      | 1.465 (1.058-2.029)  | 0.022    |                       |          |
| In-hospital antibiotic administration           | 4.861 (1.088-21.727) | 0.038    |                       |          |
| <b>Laboratory exams at baseline</b>             |                      |          |                       |          |
| WBC (*10 <sup>3</sup> /mm <sup>3</sup> )        | 0.823 (0.667-1.015)  | 0.069    |                       |          |
| <b>Depression according to HADS at 6 months</b> | 1.981 (0.955-4.109)  | 0.066    |                       |          |
| <b>Anxiety according to HADS at 6 months</b>    | 2.014 (0.980-4.137)  | 0.057    |                       |          |

COVID-19 denotes coronavirus 19-associated disease, OR odds ratio, CI confidence interval, BMI body mass index, SARS-CoV-2 severe acute respiratory syndrome coronavirus 2, GSRS Gastrointestinal Symptoms Rating Scale, WBC white blood cells and HADS hospital anxiety and depression scale.

**Online supplemental Table 10.** Post-hoc analysis reporting enrollment rate by country of Patients Selected for Primary Aim Analysis of the GI-COVID19 Study.

| Country            | Patient (n=883),<br>n. (%) |
|--------------------|----------------------------|
| Bangladesh         | 0                          |
| Cyprus             | 8 (0.9)                    |
| Egypt              | 33 (3.7)                   |
| Israel             | 9 (1)                      |
| Italy              | 183 (20.7)                 |
| India              | 34 (3.9)                   |
| Macedonia          | 47 (5.4)                   |
| Malaysia           | 28 (3.2)                   |
| Romania            | 56 (6.3)                   |
| Russian Federation | 28 (3.2)                   |
| Serbia             | 9 (1)                      |
| Spain              | 75 (8.5)                   |
| Sweden             | 17 (1.9)                   |
| Turkey             | 356 (40.3)                 |

**Online supplemental Table 10.** Post-hoc analysis reporting the presence of gastrointestinal symptoms according to GSRS at baseline in the population included in the primary aim analysis with a complete follow-up at 12 months compared to drop-out at 12 months.

|                                 | No         | Very Mild | Mild     | Moderate | Moderate Severe | Severe   | Very Severe | p     |
|---------------------------------|------------|-----------|----------|----------|-----------------|----------|-------------|-------|
| <b>Upper digestive symptoms</b> |            |           |          |          |                 |          |             |       |
| Acid regurgitation              |            |           |          |          |                 |          |             | 0.066 |
| Follow-up completed             | 526 (93.8) | 11 (2)    | 9 (1.6)  | 7 (1.3)  | 4 (0.7)         | 3 (0.5)  | 1 (0.2)     |       |
| Drop-out                        | 300 (92.6) | 2 (0.6)   | 8 (2.5)  | 12 (3.7) | 0               | 1 (0.3)  | 1 (0.3)     |       |
| Eructation                      |            |           |          |          |                 |          |             | 0.049 |
| Follow-up completed             | 506 (89.9) | 18 (3.2)  | 11 (2)   | 12 (2.1) | 5 (0.9)         | 8 (1.4)  | 3 (0.5)     |       |
| Drop-out                        | 304 (93.8) | 8 (2.5)   | 9 (2.8)  | 0        | 2 (0.6)         | 1 (0.3)  | 0           |       |
| Heartburn                       |            |           |          |          |                 |          |             | 0.355 |
| Follow-up completed             | 502 (89.2) | 16 (2.8)  | 21 (3.7) | 11 (1.9) | 5 (0.9)         | 7 (1.24) | 1 (0.2)     |       |
| Drop-out                        | 300 (92.3) | 2 (0.6)   | 12 (3.7) | 6 (1.9)  | 1 (0.3)         | 3 (0.9)  | 1 (0.3)     |       |
| Hunger pain                     |            |           |          |          |                 |          |             | 0.822 |
| Follow-up completed             | 516 (91.8) | 11 (2)    | 14 (2.5) | 12 (2.1) | 2 (0.4)         | 4 (0.7)  | 3 (0.5)     |       |
| Drop-out                        | 304 (93.8) | 4 (1.2)   | 4 (1.2)  | 7 (2.2)  | 2 (0.6)         | 2 (0.6)  | 1 (0.3)     |       |
| Nausea                          |            |           |          |          |                 |          |             | 0.135 |
| Follow-up completed             | 422 (75.2) | 35 (6.2)  | 40 (7.1) | 34 (6.1) | 12 (2.1)        | 14 (2.5) | 4 (0.7)     |       |
| Drop-out                        | 251 (78)   | 9 (2.8)   | 23 (7.1) | 21 (6.5) | 12 (3.7)        | 3 (0.9)  | 3 (0.9)     |       |
| <b>Lower digestive symptoms</b> |            |           |          |          |                 |          |             |       |
| Diarrhea                        |            |           |          |          |                 |          |             | 0.162 |
| Follow-up completed             | 391 (69.5) | 19 (3.4)  | 51 (9.1) | 49 (8.7) | 23 (4.1)        | 14 (2.5) | 16 (2.8)    |       |
| Drop-out                        | 240 (74.3) | 6 (1.9)   | 28 (8.7) | 31 (9.6) | 12 (3.7)        | 4 (1.2)  | 2 (0.6)     |       |
| Loose stool                     |            |           |          |          |                 |          |             | 0.001 |
| Follow-up completed             | 427 (75.8) | 24 (4.3)  | 41 (7.3) | 30 (5.3) | 17 (3)          | 13 (2.3) | 11 (2)      |       |
| Drop-out                        | 273 (84.3) | 3 (0.9)   | 17 (5.3) | 24 (7.4) | 3 (0.9)         | 3 (0.9)  | 1 (0.3)     |       |
| Urgency                         |            |           |          |          |                 |          |             | 0.153 |
| Follow-up completed             | 494 (87.9) | 12 (2.1)  | 15 (2.7) | 20 (3.6) | 4 (0.7)         | 10 (1.8) | 7 (1.3)     |       |
| Drop-out                        | 280 (86.4) | 8 (2.5)   | 14 (4.3) | 18 (5.6) | 2 (0.6)         | 1 (0.3)  | 1 (0.3)     |       |
| Constipation                    |            |           |          |          |                 |          |             | 0.183 |
| Follow-up completed             | 496 (87.9) | 15 (2.7)  | 19 (3.4) | 21 (3.7) | 7 (1.2)         | 4 (0.7)  | 2 (0.4)     |       |
| Drop-out                        | 302 (93.2) | 4 (1.2)   | 8 (2.5)  | 4 (1.2)  | 4 (1.2)         | 2 (0.6)  | 0           |       |
| Hard stools                     |            |           |          |          |                 |          |             | 0.310 |
| Follow-up completed             | 503 (89.5) | 12 (2.1)  | 19 (3.4) | 17 (3)   | 6 (1.1)         | 4 (0.7)  | 1 (0.2)     |       |
| Drop-out                        | 301 (93.2) | 6 (1.9)   | 8 (2.5)  | 2 (0.6)  | 4 (1.2)         | 2 (0.6)  | 0           |       |
| Incomplete evacuation           |            |           |          |          |                 |          |             | 0.456 |
| Follow-up completed             | 506 (89.9) | 15 (2.7)  | 15 (2.7) | 16 (2.8) | 7 (1.2)         | 2 (0.4)  | 2 (0.4)     |       |
| Drop-out                        | 297 (92.8) | 2 (0.6)   | 10 (3.1) | 6 (1.9)  | 3 (0.9)         | 1 (0.3)  | 1 (0.3)     |       |

|                           |            |          |          |          |          |          |         |       |
|---------------------------|------------|----------|----------|----------|----------|----------|---------|-------|
| <b>Abdominal symptoms</b> |            |          |          |          |          |          |         |       |
| Abdominal distension      |            |          |          |          |          |          |         | 0.593 |
| Follow-up completed       | 485 (86.2) | 14 (2.5) | 23 (4.1) | 20 (3.6) | 10 (1.8) | 7 (1.2)  | 4 (0.7) |       |
| Drop-out                  | 287 (88.6) | 11 (3.4) | 12 (3.7) | 9 (2.8)  | 2 (0.6)  | 2 (0.6)  | 1 (0.3) |       |
| Abdominal pain            |            |          |          |          |          |          |         | 0.261 |
| Follow-up completed       | 454 (81.2) | 13 (2.3) | 34 (6.1) | 30 (5.4) | 12 (2.2) | 12 (2.2) | 4 (0.7) |       |
| Drop-out                  | 255 (78.7) | 19 (5.9) | 19 (5.9) | 15 (4.6) | 8 (2.5)  | 6 (1.9)  | 2 (0.6) |       |
| Borborygmi                |            |          |          |          |          |          |         | 0.042 |
| Follow-up completed       | 470 (83.5) | 23 (4.1) | 28 (5)   | 18 (3.2) | 10 (1.8) | 8 (1.4)  | 6 (1.1) |       |
| Drop-out                  | 294 (90.7) | 8 (2.5)  | 8 (2.5)  | 10 (3.1) | 2 (0.6)  | 0        | 2 (0.6) |       |
| Increased flatus          |            |          |          |          |          |          |         | 0.298 |
| Follow-up completed       | 489 (86.7) | 21 (3.7) | 15 (2.7) | 16 (2.8) | 13 (2.3) | 8 (1.4)  | 2 (0.4) |       |
| Drop-out                  | 297 (91.4) | 7 (2.2)  | 7 (2.2)  | 9 (2.8)  | 4 (1.2)  | 1 (0.3)  | 0       |       |
